# Supplementary material for: Immunomodulatory Effect and Bone Homeostasis Regulation in Osteoblasts Differentiated from hADMSCs via the PD-1/PD-L1 Axis
Source: MDPI journal article supplement (doi:10.3390/cells11193152), 2022-10-07
Supplement: s1 [file s1]

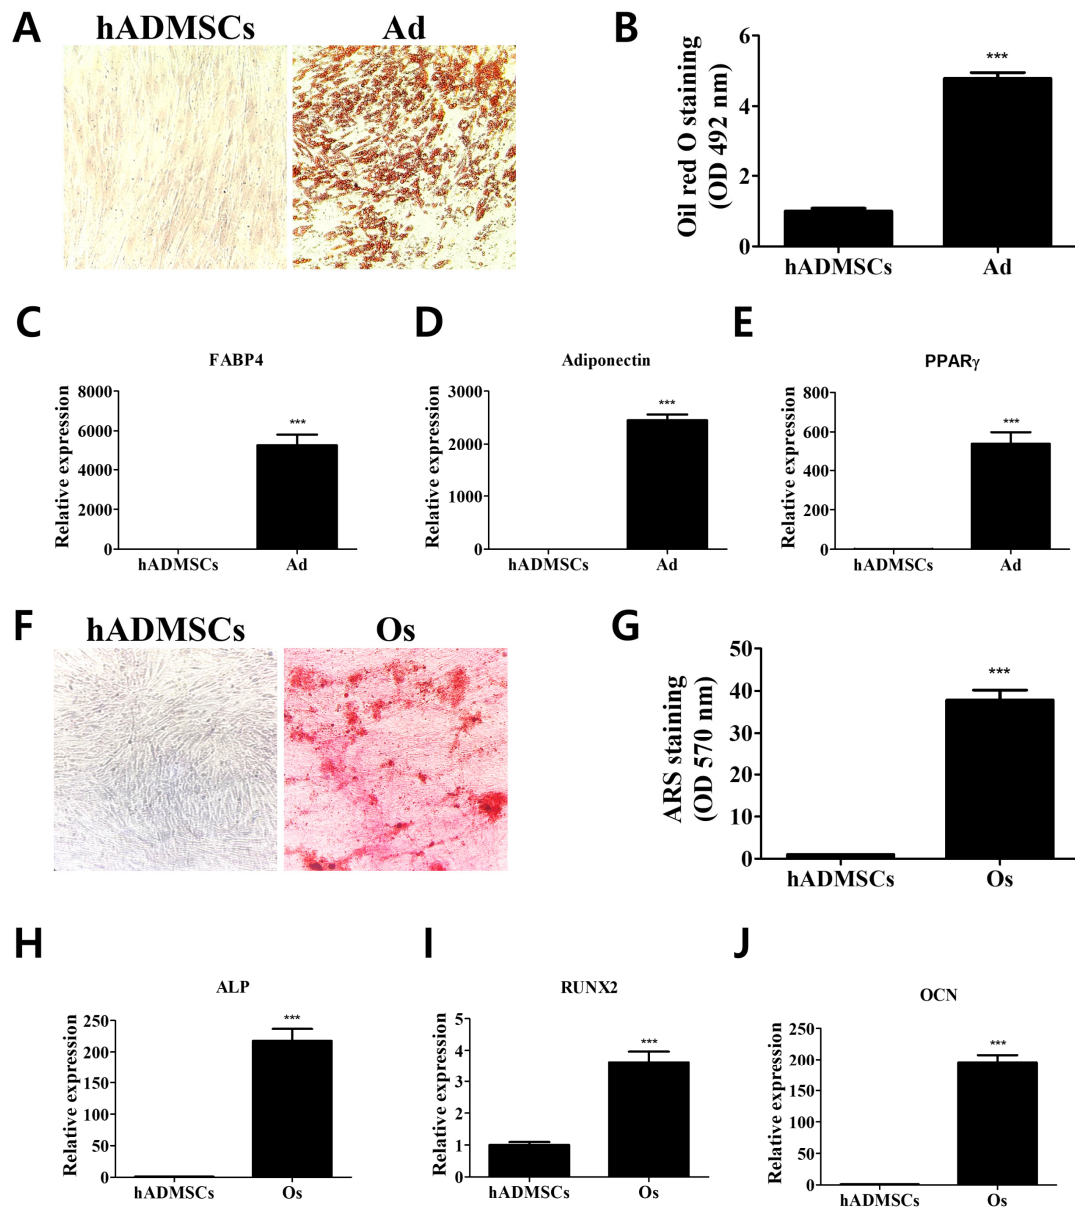

**Figure S1. Validation of the differentiated cells from hADMSCs.** (A) Oil Red O stained of hADMSCs and Adipocytes. (B) Stained lipid droplets are dissolved and quantified.  $N = 5$  trials per sample and control. Relative expression of adipocyte specific markers (C) *FABP4*, (D) *Adiponectin* and (E) *PPAR $\gamma$* .  $N = 3$  trials per sample and control. (F) Alizarin Red S stained hADMSCs and osteoblasts. (G) Stained calcium deposits were dissolved and quantified.  $N = 5$  trials per sample and control. Relative expression of osteoblast specific markers (H) *ALP*, (I) *OCN* and (J) *RUNX2*.  $N = 3$  trials per sample and control. Data are presented as mean  $\pm$  SEM. \*\*\*  $p < 0.001$ , compared with the hADMSCs group. Ad: adipocytes; Os: osteoblasts.

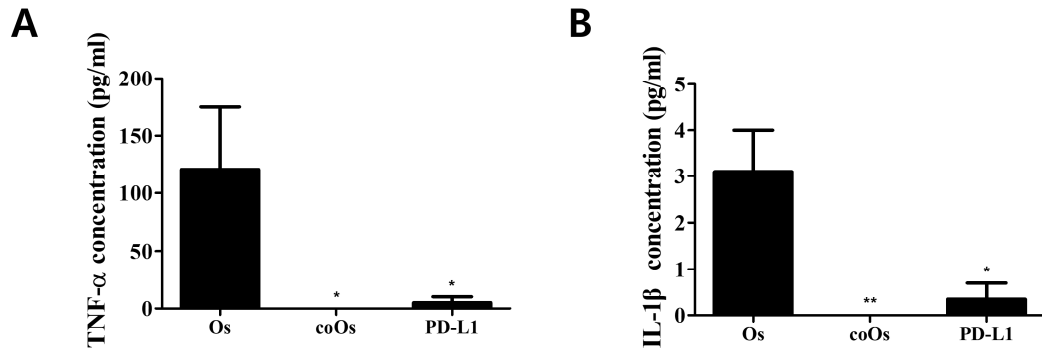

**Figure S2. Regulation of the secreted levels of proinflammatory cytokines in differentiated osteoblasts cocultured with hADMSCs.** Secreted levels of proinflammatory cytokines (A) TNF- $\alpha$ , (B) IL-1 $\beta$  in cell culture medium.  $N = 3$  trials per sample. Data are presented as mean  $\pm$  SEM. \*  $p < 0.05$  and \*\*  $p < 0.01$  compared with the Os group. Os: osteoblasts; coOs: cocultured osteoblasts; PD-L1: PD-L1 treated monocultured osteoblasts (500 ng/ml).

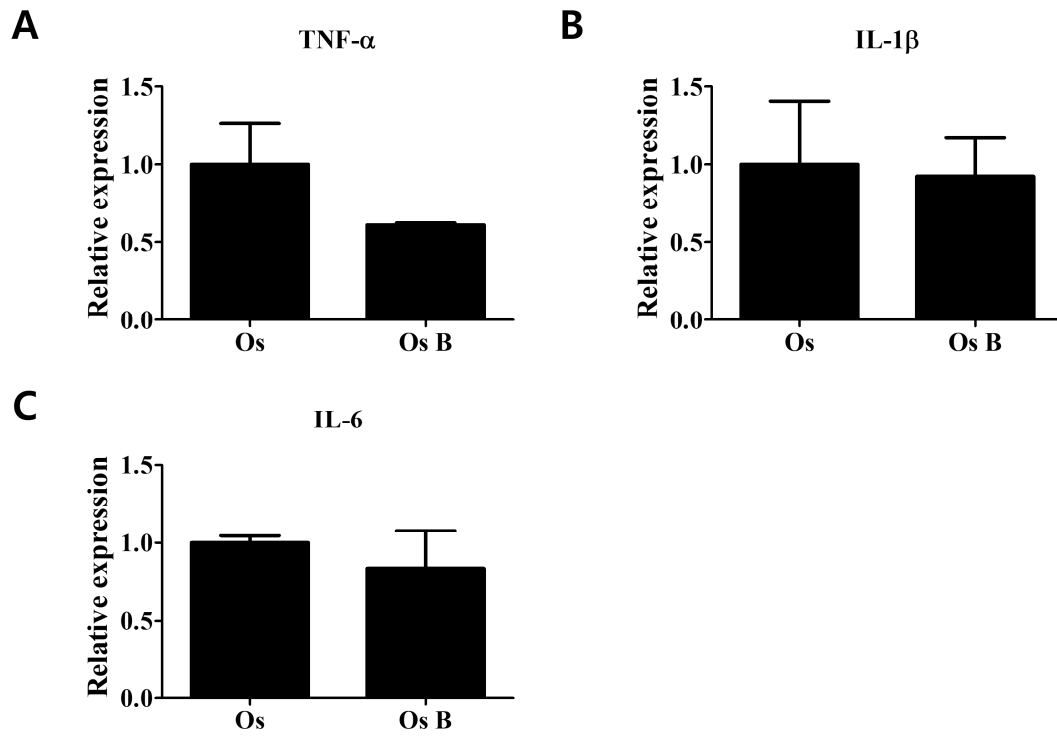

**Figure S3. Effect of PD-1/PD-L1 inhibition on monocultured osteoblasts.** Relative mRNA expression levels of proinflammatory cytokines (A) *TNF- $\alpha$* , (B) *IL-1 $\beta$* , and (C) *IL-6*.  $N = 3$  trials per sample. Data are presented as mean  $\pm$  SEM. Os: osteoblasts; B: BMS 202 (10  $\mu$ M).

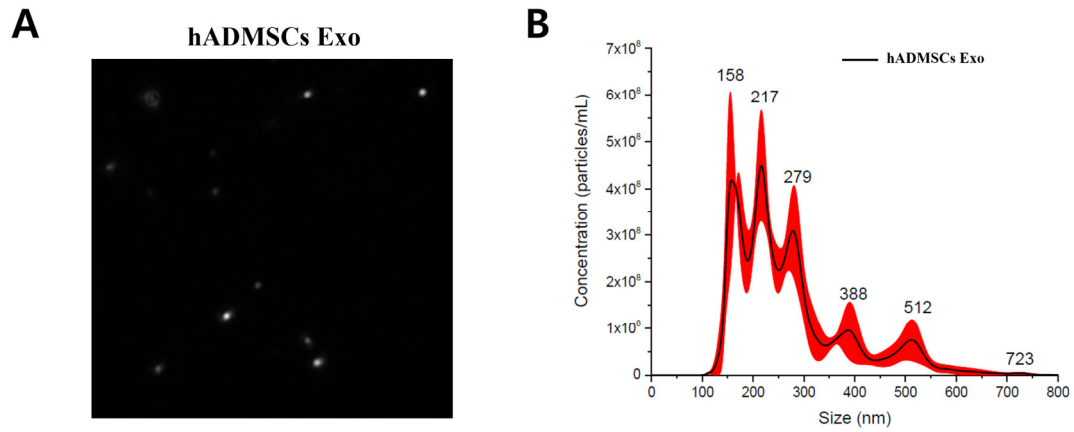

**Figure S4. Characterization of exosomes derived from hADMSCs.** (A) Nanoparticle tracking analysis (NTA) image of hADMSCs derived exosomes. (B) Number concentration profiles of exosomes from hADMSCs.  $N = 3$  trials per sample and control. hADMSCs Exo: hADMSCs derived exosome.

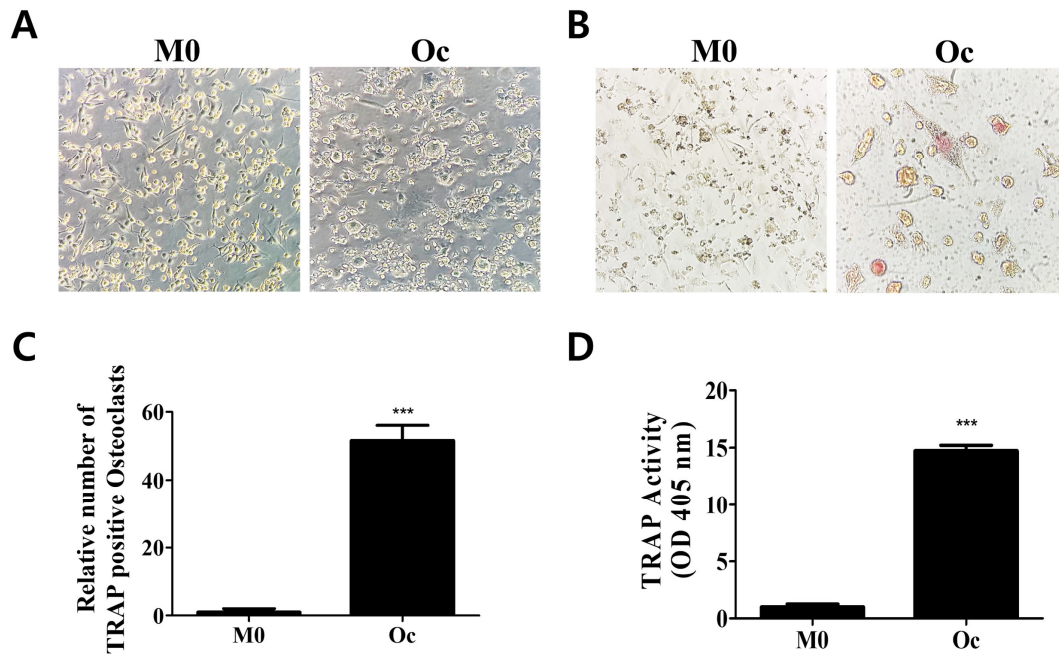

**Figure S5. Establishment of osteoclast differentiation from THP-1 monocytes.** (A) Morphological difference between M0 macrophages and differentiated osteoclasts.  $N = 3$  trials per sample and control. (B) TRAP stained M0 macrophages and osteoclasts. (C) Relative number of TRAP positive osteoclasts.  $N = 3$  trials per sample and control. (D) Relative TRAP activity in cell cultured medium of osteoclasts compared with M0 macrophages.  $N = 3$  trials per sample and control. Data are presented as mean  $\pm$  SEM. \*\*\*  $p < 0.001$ , compared with the hADMSCs group. M0: M0 macrophages; Oc: osteoclasts.
